# Supplementary material for: Long-living, stress- and pH-tolerant superhydrophobic silica particles via fast and efficient urethane chemistry; facile preparation of self-recoverable SH coatings
Source: Royal Society of Chemistry journal article supplement (doi:10.1039/c4ta04901b), 2014-11-07
Supplement: c4ta04901b1.pdf [file c4ta04901b1.pdf]

### Electronic Supplementary Information

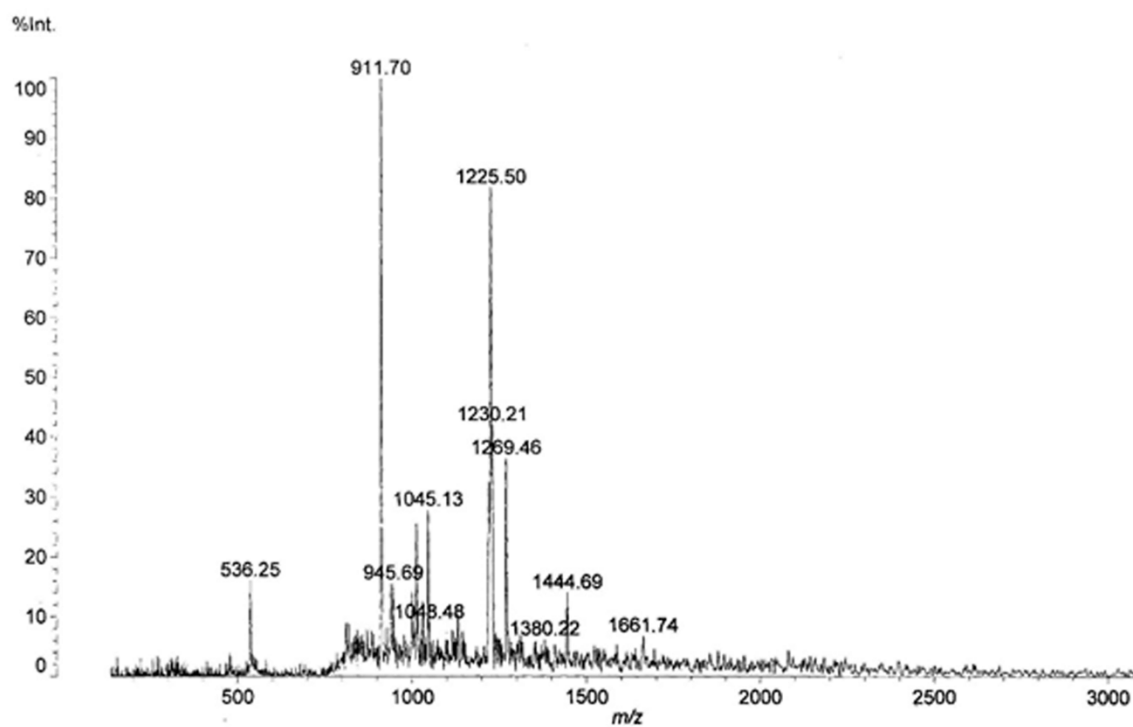

**SI1** MALDI-TOF-MS spectrum of oligomer separated from OWS particles

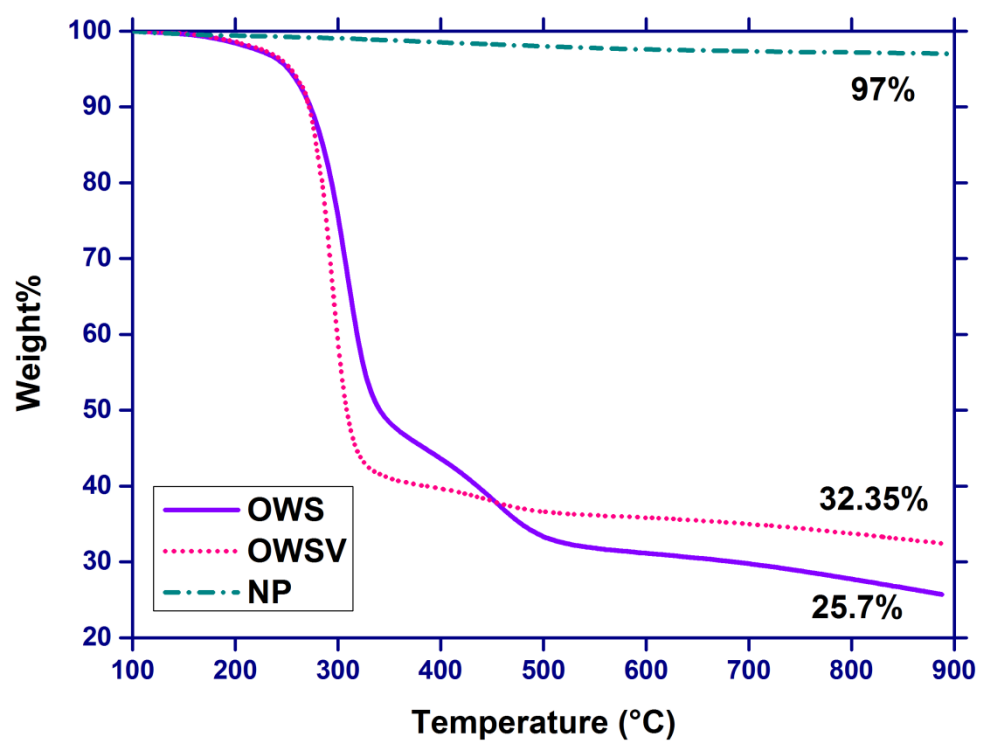

**SI2** Thermogravimetric profiles of OWS & OWSV particles (10 °C/min., N<sub>2</sub>)

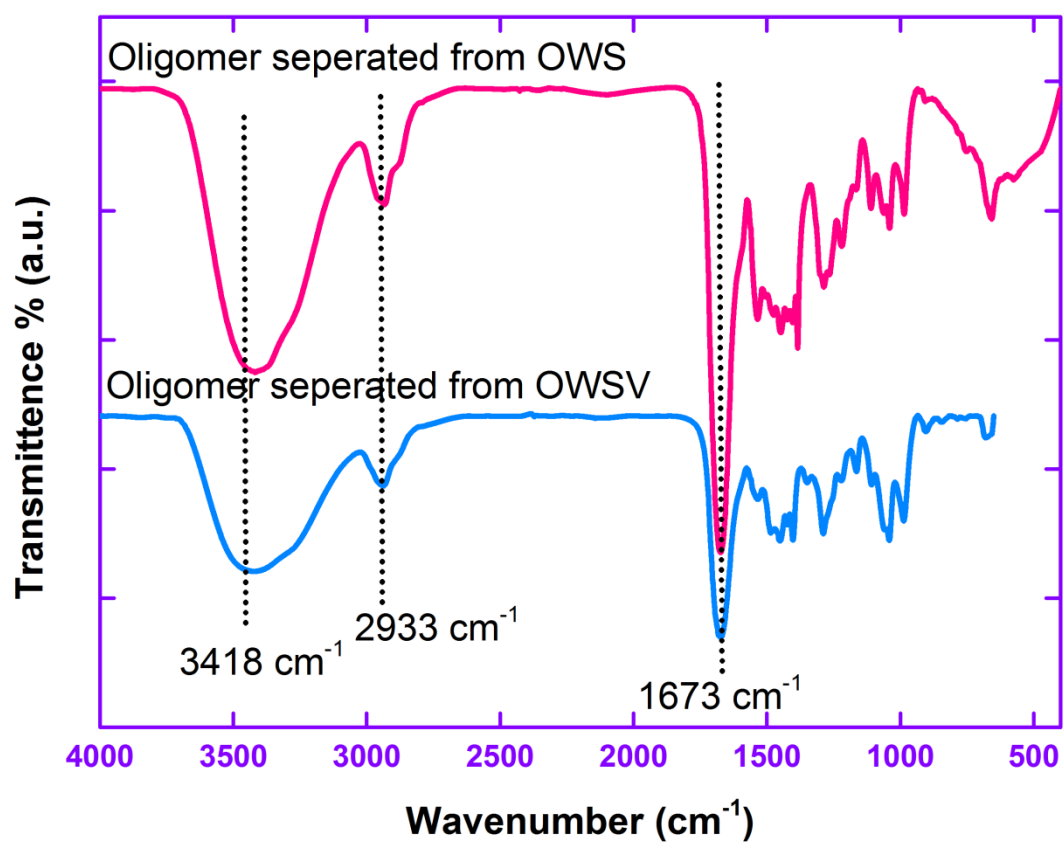

**SI3** FTIR spectra of oligomers separated from OWS & OWSV particles which show the allophanate linkage at 1673 cm<sup>-1</sup>

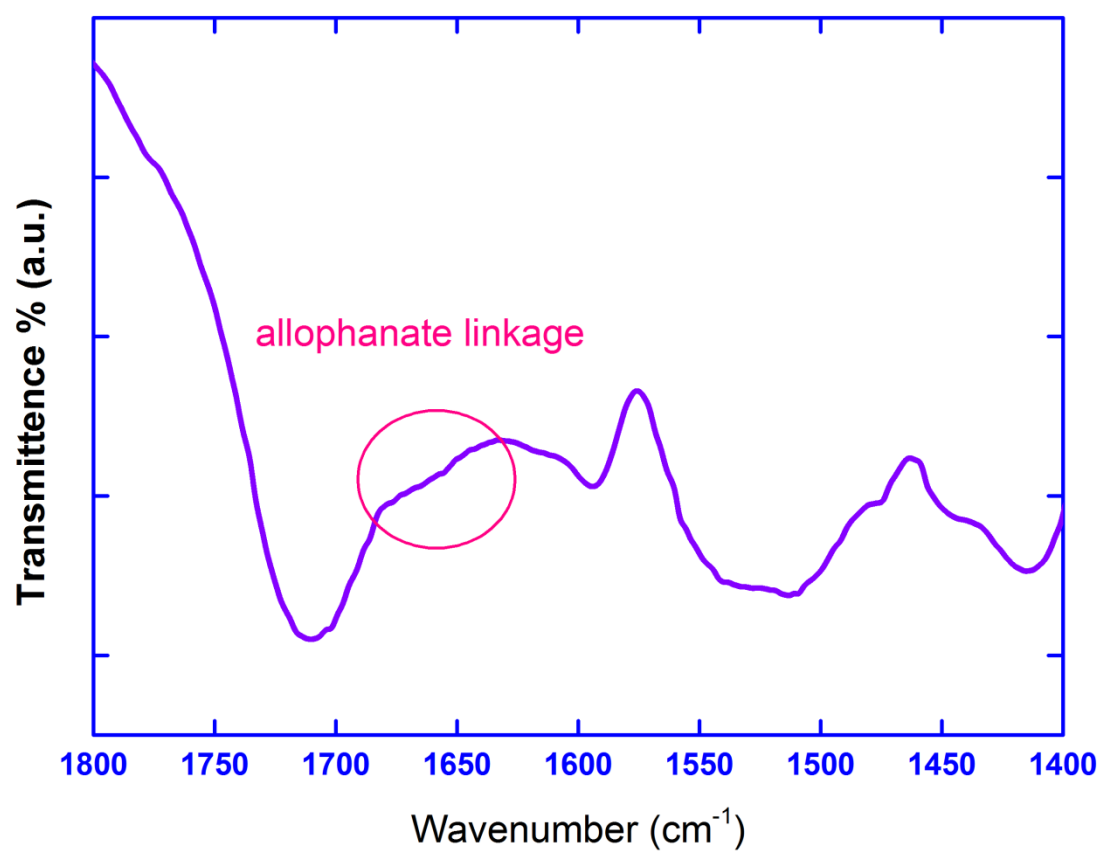

**SI4** Observation of allophanate linkage at 1680-1620 cm<sup>-1</sup> from FTIR spectrum.

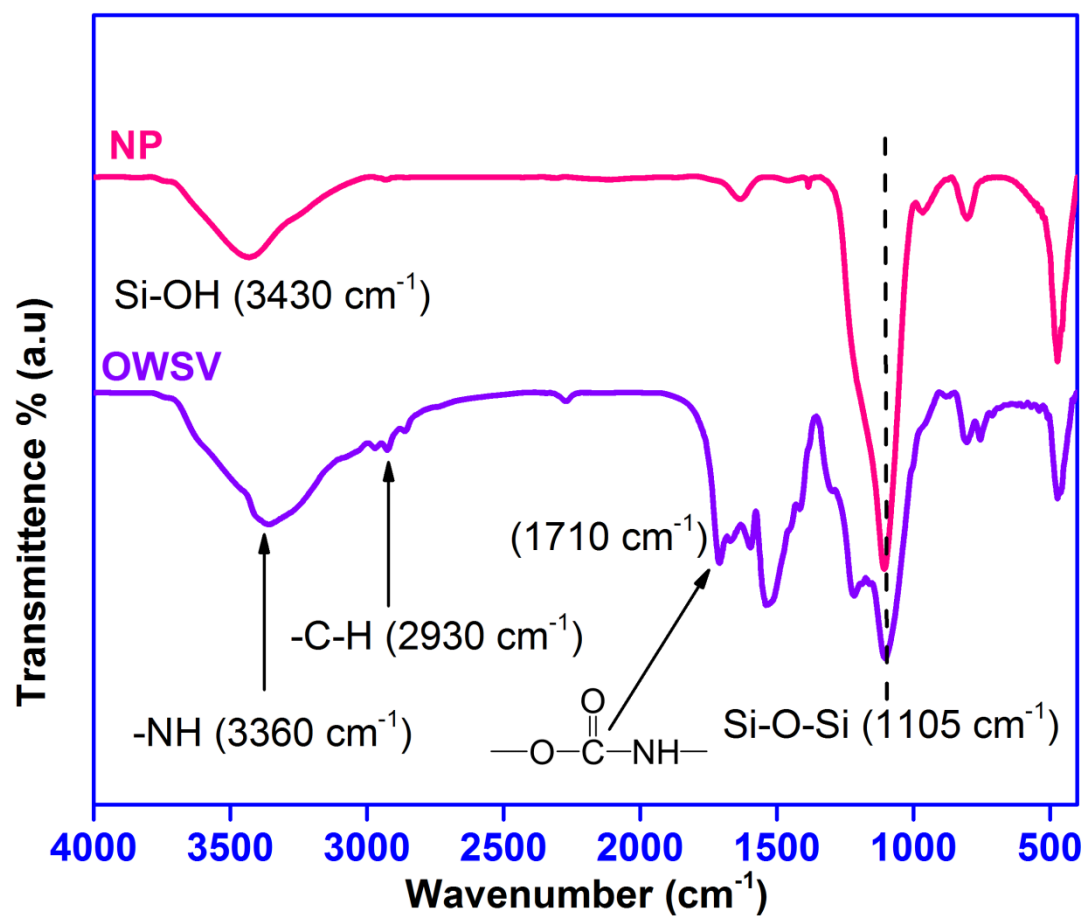

**SI5** FTIR spectra of unfunctionalized silica and OWSV particles

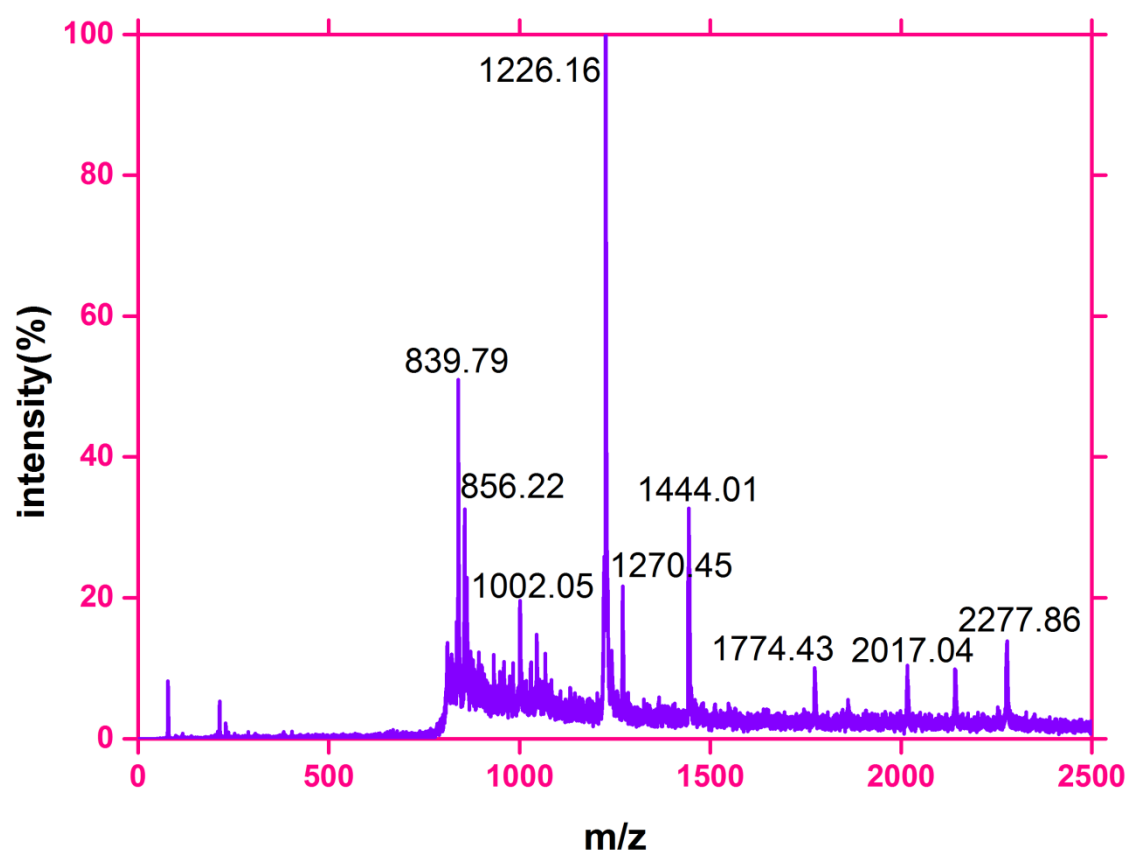

**SI6** MALDI-TOF-MS spectrum of oligomer separated from OWSV particles

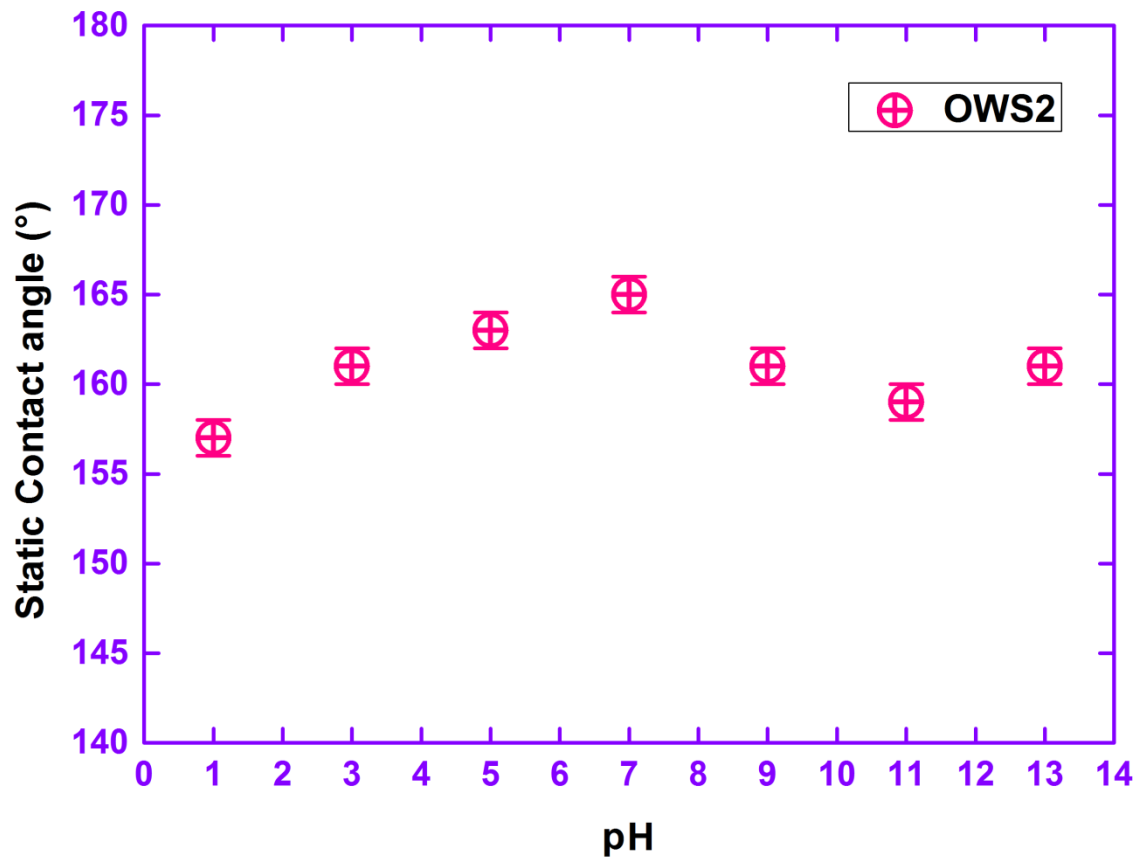

**SI7** Variation in static contact angles of OWSV surfaces at different pH conditions

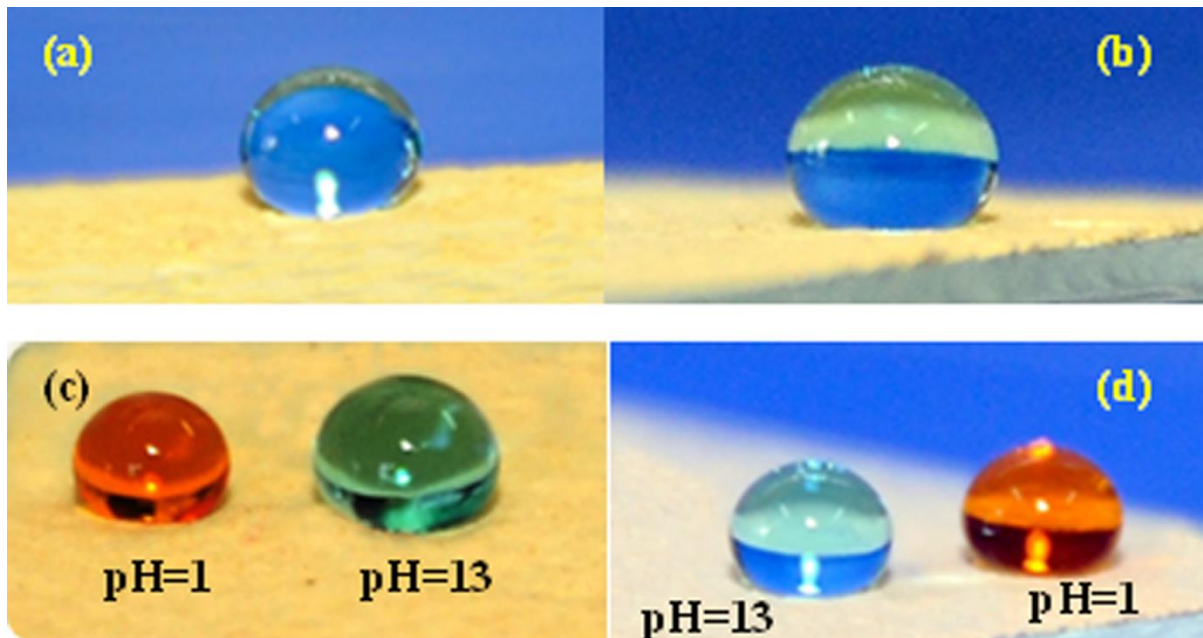

**SI8** Profile of water droplets on superhydrophobic coating a) water droplet before treatment b) water droplet on self-recovered surface after water impalement test c) acidic and basic water droplets just after stress test d) acidic and basic water droplets on self-recovered surface after stress test.

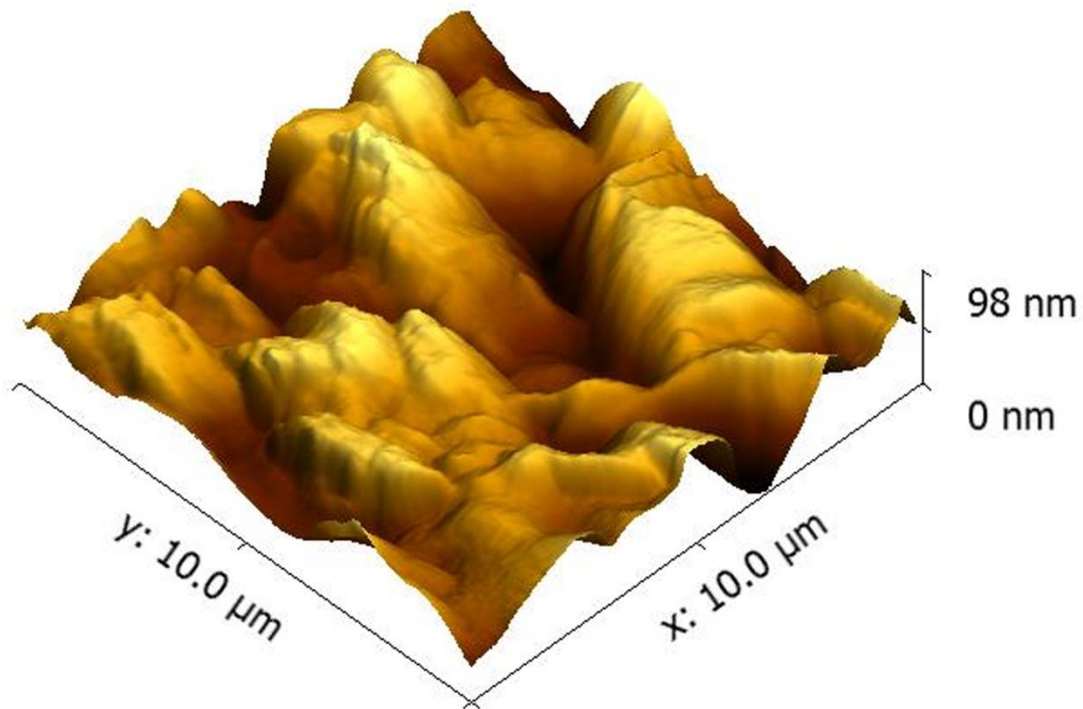

**SI9** AFM image of self-recoverable coating. Scan area  $10\mu\text{m} \times 10\mu\text{m}$

The water hammer pressure created by the water droplets is given by (Ref: Y. C. Huang, F. G. Hammitt and W. J. Yang, *Journal of Fluids Engineering*, 1973, 95, 276-292).

The velocity of water droplet  $V = (2gh)^{1/2}$  (for freely falling body)

(Initial (potential energy+ kinetic energy) =Final (PE +KE)

$$mgh + 0 = 0 + (0.5 mv^2)$$

$$\text{i.e. } mgh = 0.5 mv^2, \text{ hence } V = (2gh)^{1/2}$$

$$\text{Here } V = 3.13 \text{ m/s (i.e. } g = 9.8 \text{ m/s}^2, h = 0.5 \text{ m)}$$

**Water hammer pressure,  $P_h = 0.2 \rho C V$**

where  $\rho$  = density of water =  $1000 \text{ kg/m}^3$

$C$  = velocity of sound in water at  $28^\circ\text{C}$  =  $1500 \text{ m/s}$

$V$  = velocity of water =  $3.13 \text{ m/s}$

$$\text{Water hammer pressure, } P = 0.2(1000)(1500)(3.13) = 939 \text{ kPa} \approx 1 \text{ MPa}$$

**SI10** Calculation of water hammer pressure.
